# Supplementary material
Source: ML conference proceedings conference paper supplement (https://openaccess.thecvf.com/content/CVPR2025/html/Wang_Mamba-Reg_Vision_Mamba_CVPR_2025_paper.html)
Supplement: Supplementary file 1 [file Wang_Mamba-Reg_Vision_Mamba_CVPR_2025_supplemental.pdf]

# Mamba<sup>®</sup>: Vision Mamba Also Needs Registers

## Supplementary Material

### Appendix

#### A. More Technical Details

lowing a cosine decay scheduling with 5 epochs warmup. We use color jitter with a factor of 0.3, mixup and cutmix with alpha setting to 0.8 and 1.0, respectively.

Table 7. Pre-training configurations

| Configuration         | Small | Base  | Large |
|-----------------------|-------|-------|-------|
| input size            |       | 128   |       |
| epochs                |       | 300   |       |
| optimizer             |       | AdamW |       |
| weight decay          |       | 0.05  |       |
| base learning rate    | 5e-4  | 2e-4  | 2e-4  |
| batch size            | 1024  | 2048  | 2048  |
| drop path             |       | 0.1   |       |
| label smoothing       |       | ✗     |       |
| random erasing        |       | ✗     |       |
| Rand Augmentation     |       | ✗     |       |
| repeated augmentation |       | ✓     |       |
| ThreeAugmentation     |       | ✓     |       |

Table 9. Fine-tuning configurations

| Configuration         | Small                | Base  | Large |
|-----------------------|----------------------|-------|-------|
| input size            |                      | 224   |       |
| epochs                |                      | 20    |       |
| optimizer             |                      | AdamW |       |
| weight decay          |                      | 0.1   |       |
| base learning rate    |                      | 1e-5  |       |
| batch size            |                      | 512   |       |
| drop path             | 0.2                  | 0.4   | 0.6   |
| label smoothing       |                      | 0.1   |       |
| random erasing        |                      | ✗     |       |
| Rand Augmentation     | rand-m9-mstd0.5-inc1 |       |       |
| repeated augmentation |                      | ✗     |       |
| ThreeAugmentation     |                      | ✗     |       |

Table 8. Intermediate training configurations

| Configuration         | Small | Base  | Large |
|-----------------------|-------|-------|-------|
| input size            |       | 224   |       |
| epochs                |       | 100   |       |
| optimizer             |       | AdamW |       |
| weight decay          |       | 0.05  |       |
| base learning rate    |       | 2e-4  |       |
| batch size            |       | 1024  |       |
| drop path             | 0.2   | 0.4   | 0.4   |
| label smoothing       |       | ✗     |       |
| random erasing        |       | ✗     |       |
| Rand Augmentation     |       | ✗     |       |
| repeated augmentation |       | ✓     |       |
| ThreeAugmentation     |       | ✓     |       |

We train Mamba<sup>®</sup>-Tiny by the configurations of DeiT-Tiny [38] but follow a weaker data augmentation strategy used in [39]. For bigger sizes of Mamba<sup>®</sup> models, we use a three-stage training approach to prevent over-fitting and reduce effective training epochs. We summarize the recipes of pre-training, intermediate training, and fine-tuning in Table 7, Table 8, and Table 9, respectively. For all stages, the learning rate is calculated by  $\text{base lr} \times \text{batch size} / 512$ , fol-
